# Supplementary material for: Single-ion conducting artificial solid electrolyte interphase layers for dendrite-free and highly stable lithium metal anodes
Source: Royal Society of Chemistry journal article supplement (doi:10.1039/c9ta02407g), 2019-01-01
Supplement: c9ta02407g1.pdf [file c9ta02407g1.pdf]

## Supporting Information

### **Single-ion conducting artificial solid electrolyte interphase layer for dendrite-free and highly stable lithium metal anode**

*Kuirong Deng, Dongmei Han, Shan Ren, Shuanjin Wang, Min Xiao\* and Yuezhong Meng\**

*The Key Laboratory of Low-carbon Chemistry & Energy Conservation of Guangdong Province / State Key Laboratory of Optoelectronic Materials and Technologies, School of Materials Science and Engineering, Sun Yat-sen University, Guangzhou 510275, PR China.*

*\*Corresponding authors: [mengyzh@mail.sysu.edu.cn](mailto:mengyzh@mail.sysu.edu.cn) (Yuezhong Meng) or [stsxm@mail.sysu.edu.cn](mailto:stsxm@mail.sysu.edu.cn) (Min Xiao)*

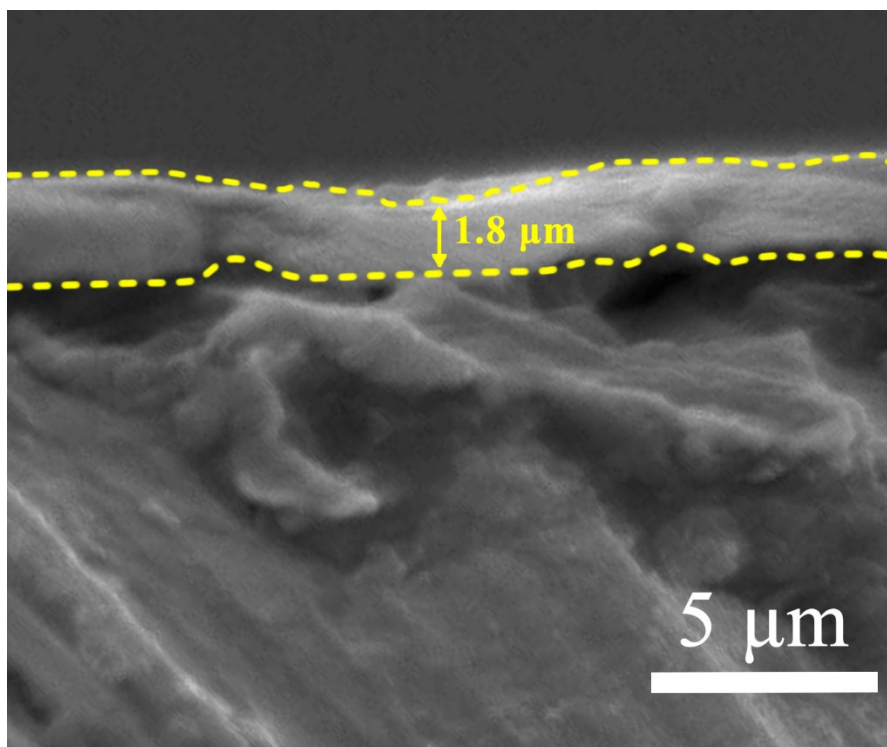

**Fig. S1** Cross-sectional SEM image of LP coated Cu foil.

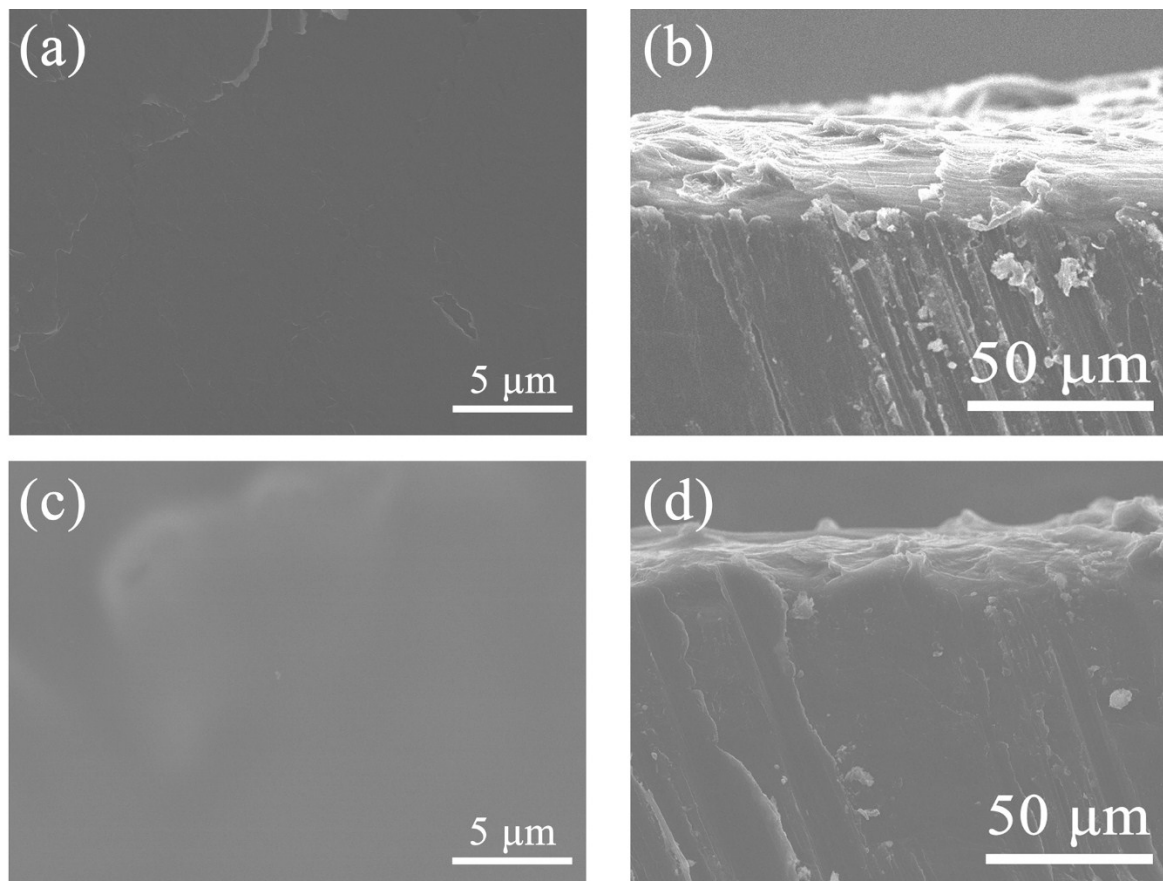

**Fig. S2** Morphologies of LP-Li and bare Li before Li plating/stripping test: (a) Top-view and (b) cross-sectional SEM images of bare Li; (c) Top-view and (d) cross-sectional SEM images of LP-Li.

**Table S1.** Summary of Artificial SEI with lithium plating/stripping cycling test

| Artificial SEI                                         | Current density (mA cm <sup>-2</sup> ) | Cycle time (h) |
|--------------------------------------------------------|----------------------------------------|----------------|
| LP (this work)                                         | 8                                      | 992            |
| PVDF-HFP/LiF <sup>1</sup>                              | 5                                      | 100            |
| SiCl <sub>4</sub> <sup>2</sup>                         | 3                                      | 350            |
| MPS/TEOS <sup>3</sup>                                  | 2                                      | 200            |
| PVDF <sup>4</sup>                                      | 1                                      | 200            |
| Polymer skin <sup>5</sup>                              | 0.5                                    | 300            |
| Silly Putty <sup>6</sup>                               | 1                                      | 120            |
| PECA <sup>7</sup>                                      | 1                                      | 200            |
| LiPAA <sup>8</sup>                                     | 2                                      | 120            |
| ALD LiPON <sup>9</sup>                                 | 2                                      | 220            |
| Al <sub>2</sub> O <sub>3</sub> /PVdF-HFP <sup>10</sup> | 10                                     | 20             |
| LiF <sup>11</sup>                                      | 5                                      | 120            |
| AlI <sub>3</sub> -DOL <sup>12</sup>                    | 3                                      | 40             |
| Al <sub>2</sub> O <sub>3</sub> <sup>13</sup>           | 0.5                                    | 1200           |
| PEO/LLZNO <sup>14</sup>                                | 0.5                                    | 1000           |
| Al <sub>2</sub> O <sub>3</sub> <sup>15</sup>           | 3                                      | 800            |

## References:

1. R. Xu, X.-Q. Zhang, X.-B. Cheng, H.-J. Peng, C.-Z. Zhao, C. Yan and J.-Q. Huang, *Adv. Funct. Mater.*, 2018, **28**, 1705838.
2. Q. Zhao, Z. Tu, S. Wei, K. Zhang, S. Choudhury, X. Liu and L. A. Archer, *Angew. Chem.*, 2018, **130**, 1004-1008.
3. F. Liu, Q. Xiao, H. B. Wu, L. Shen, D. Xu, M. Cai and Y. Lu, *Adv. Energy Mater.*, 2018, **8**, 1701744.
4. J. Luo, C.-C. Fang and N.-L. Wu, *Adv. Energy Mater.*, 2018, **8**, 1701482.
5. Y. Gao, Y. Zhao, Y. C. Li, Q. Huang, T. E. Mallouk and D. Wang, *J. Am. Chem. Soc.*, 2017, **139**, 15288-15291.
6. K. Liu, A. Pei, H. R. Lee, B. Kong, N. Liu, D. Lin, Y. Liu, C. Liu, P.-c. Hsu, Z. Bao and Y. Cui, *J. Am. Chem. Soc.*, 2017, **139**, 4815-4820.
7. Z. Hu, S. Zhang, S. Dong, W. Li, H. Li, G. Cui and L. Chen, *Chem. Mater.*, 2017, **29**, 4682-4689.
8. N.-W. Li, Y. Shi, Y.-X. Yin, X.-X. Zeng, J.-Y. Li, C.-J. Li, L.-J. Wan, R. Wen and Y.-G. Guo, *Angew. Chem. Int. Ed.*, 2018, **57**, 1505-1509.
9. A. C. Kozen, C.-F. Lin, O. Zhao, S. B. Lee, G. W. Rubloff and M. Noked, *Chem. Mater.*, 2017, **29**, 6298-6307.
10. H. Lee, D. J. Lee, Y.-J. Kim, J.-K. Park and H.-T. Kim, *J. Power Sources*, 2015, **284**, 103-108.
11. J. Zhao, L. Liao, F. Shi, T. Lei, G. Chen, A. Pei, J. Sun, K. Yan, G. Zhou, J. Xie, C. Liu, Y. Li, Z. Liang, Z. Bao and Y. Cui, *J. Am. Chem. Soc.*, 2017, **139**, 11550-11558.
12. L. Ma, M. S. Kim and L. A. Archer, *Chem. Mater.*, 2017, **29**, 4181-4189.
13. L. Wang, L. Zhang, Q. Wang, W. Li, B. Wu, W. Jia, Y. Wang, J. Li and H. Li, *Energy Storage Mater.*, 2018, **10**, 16-23.
14. C. Yang, B. Liu, F. Jiang, Y. Zhang, H. Xie, E. Hitz and L. Hu, *Nano Res.*, 2017, **10**, 4256-4265.
15. Z. Tu, S. Choudhury, M. J. Zachman, S. Wei, K. Zhang, L. F. Kourkoutis and L. A. Archer, *Joule*, 2017, **1**, 394-406.
